# Supplementary material for: Anion binding consistency by influence of aromatic meta-disubstitution of a simple urea receptor: regular entrapment of hydrated halide and oxyanion clusters
Source: Royal Society of Chemistry journal article supplement (doi:10.1039/c7ce01155e), 2017-01-01
Supplement: c7ce01155e1.pdf [file c7ce01155e1.pdf]

## **Supporting Information**

### **Anion Binding Consistency by influence of Aromatic *meta*- disubstitution of a Simple Urea Receptor: Regular Entrapment of Hydrated Halide and Oxyanion clusters**

Utsab Manna, and Gopal Das\*

Department of Chemistry, Indian Institute of Technology Guwahati, Assam-781039,

India

E-mail: [gdas@iitg.ernet.in](mailto:gdas@iitg.ernet.in)

## Characterization of receptor L:

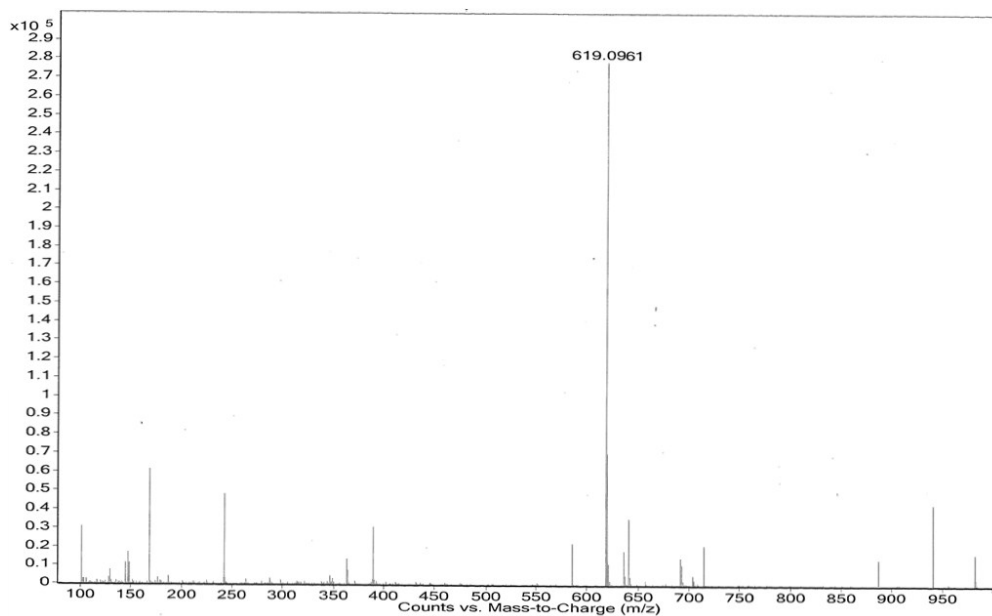

**Figure S1:** ESI-mass spectrum of receptor L.

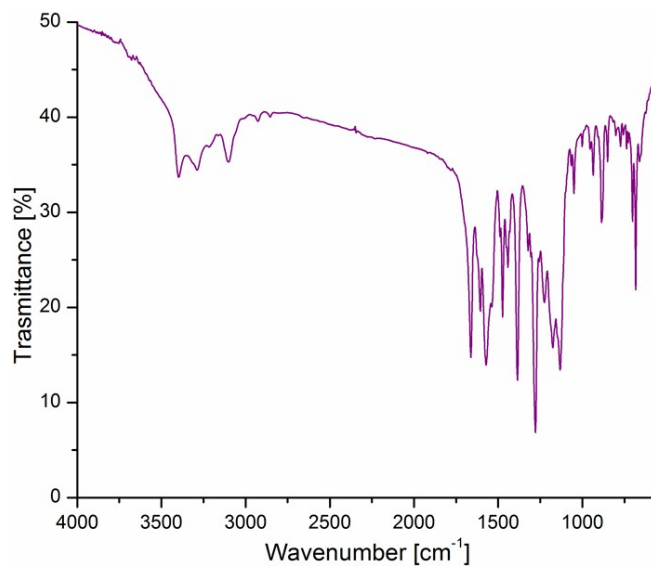

**Figure S2:** FT-IR spectrum of receptor L recorded in KBr pellet: 3199 cm<sup>-1</sup>  $\nu$ s(N-H), 3289 cm<sup>-1</sup>  $\nu$ s(C-H), 3096 cm<sup>-1</sup>  $\nu$ s(C-H), 1641 cm<sup>-1</sup>  $\nu$ s(C=O), 1258 cm<sup>-1</sup>  $\nu$ s(C-F).

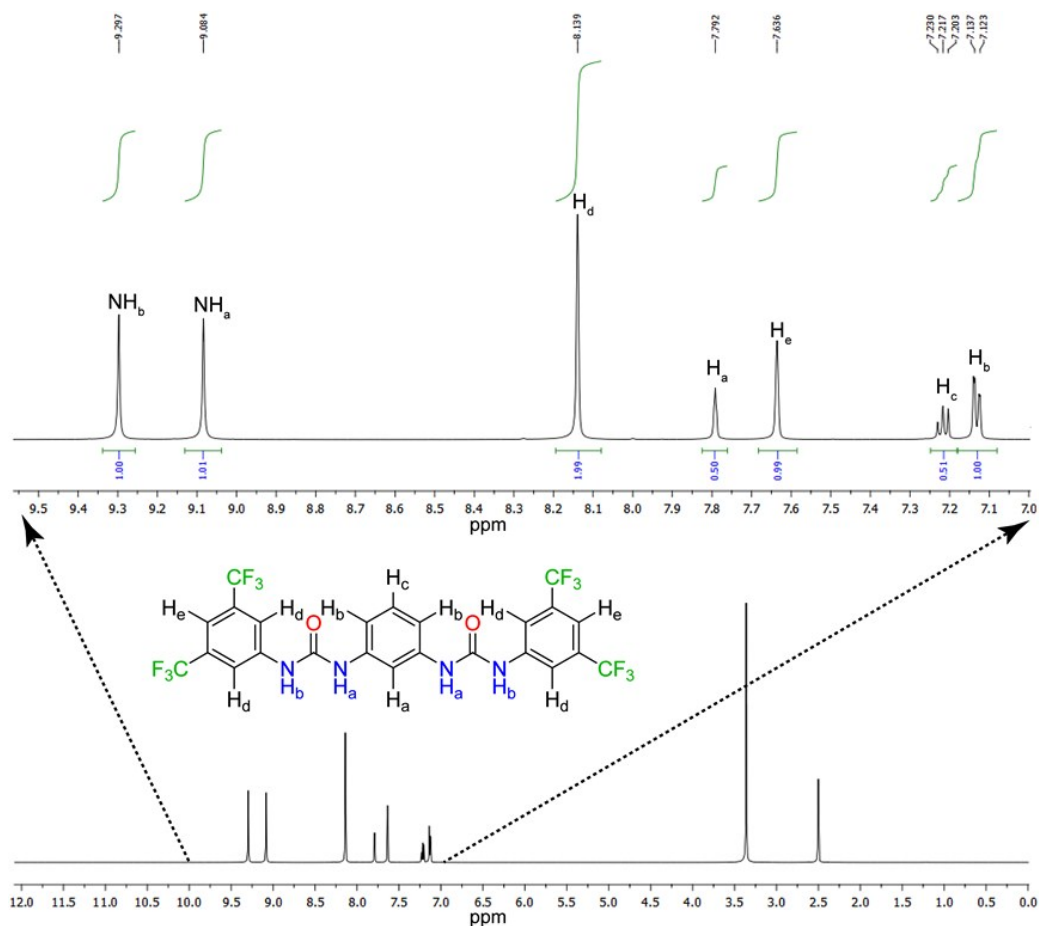

**Figure S3:**  $^1\text{H}$  NMR spectrum of receptor **L** in  $\text{DMSO-}d_6$  (600 MHz,  $\text{DMSO-}d_6$ )  $\delta$  (ppm): 7.123-7.137 (d, 2H,  $\sim 8.4$  Hz, Ar-H), 7.203-7.230 (t, 1H,  $\sim 7.8$  Hz, Ar-H), 7.636 (s, 2H, Ar-H), 7.792 (s, 1H, Ar-H), 8.139 (s, 4H, Ar-H), 9.084 (s, 2H, NHa), 9.297 (s, 2H, NHb).

### Characterization of complex **1**:

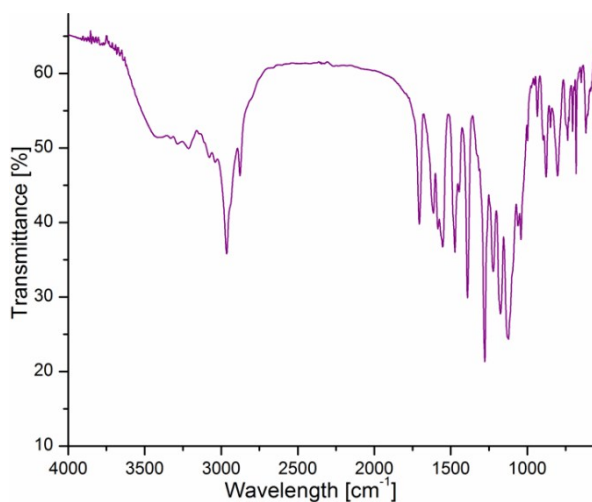

**Figure S4:** FT-IR spectrum of hydrated-sulphate complex **1** recorded in KBr pellet: broad band at  $3425\text{ cm}^{-1}$   $\nu_s(\text{O-H})$ ,  $3302\text{ cm}^{-1}$   $\nu_s(\text{N-H})$ ,  $3218\text{ cm}^{-1}$   $\nu_s(\text{C-H})$ ,  $2853\text{ cm}^{-1}$   $\nu_s(\text{C-H})$ ,  $1678\text{ cm}^{-1}$   $\nu_s(\text{C=O})$ ,  $1273\text{ cm}^{-1}$   $\nu_s(\text{C-F})$ .  $1198\text{ cm}^{-1}$   $\nu_s(\text{S-O})$ .

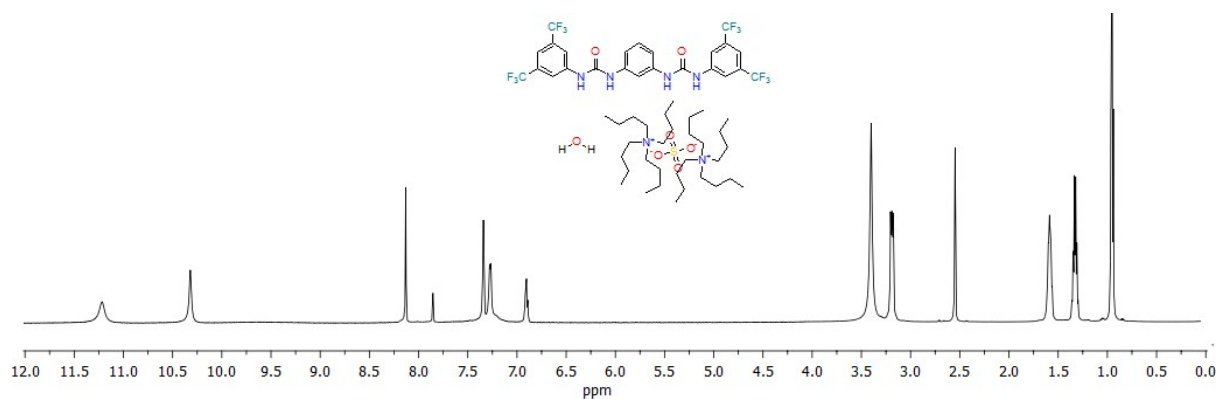

**Figure S5:**  $^1\text{H}$  NMR spectrum of complex **1** in  $\text{DMSO-}d_6$  (Varian-600 MHz) at 298 K,  $\delta$  (ppm): 0.892-0.916 (t, 12H,  $\sim 7.2$  Hz, TBA- $\text{CH}_3$ ), 1.251-1.311 (m, 8H, TBA- $\text{CH}_2$ ), 1.514-1.566 (m, 8H, TBA- $\text{CH}_2$ ), 3.128-3.156 (t, 8H,  $\sim 8.4$  Hz,  $\text{N}^+$ -TBA- $\text{CH}_2$ ), 6.890-6.917 (t, 1H,  $\sim 8.4$  Hz, Ar-H), 7.267-7.278 (d, 2H,  $\sim 6.6$  Hz, Ar-H), 7.341 (s, 2H, Ar-H), 7.816 (s, 1H, Ar-H), 8.129 (s, 4H, Ar-H), 10.320 (s, 2H,  $\text{NH}_a$ ), 11.212 (s, 2H,  $\text{NH}_b$ ).

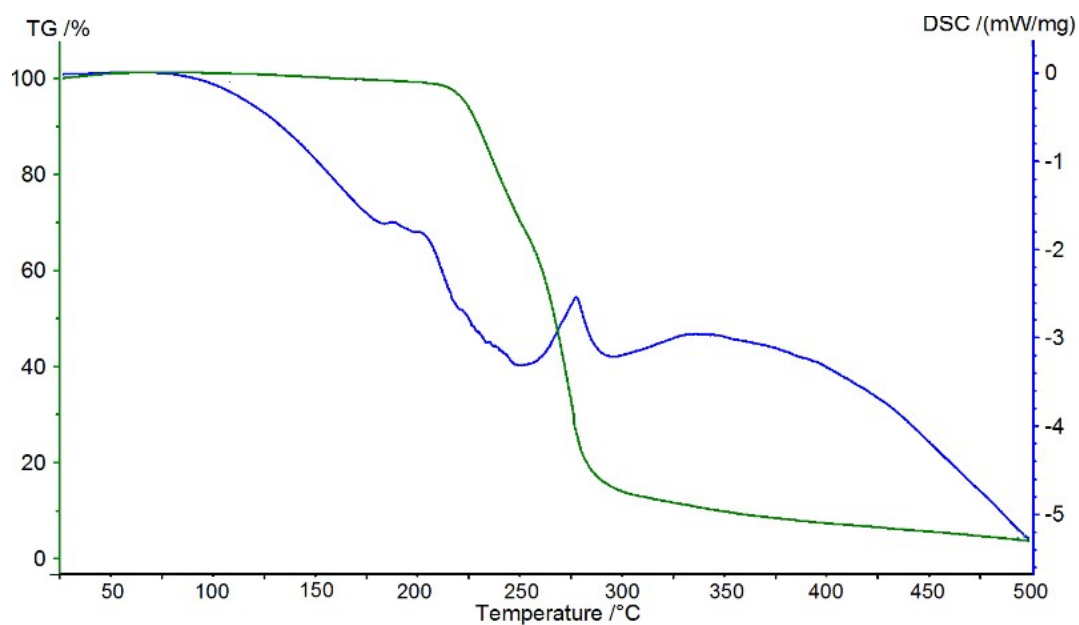

**Figure S6:** Thermogravimetric analysis (TGA) curve differential scanning calorimetry (DSC) curve of complex **1** at a heating rate of  $10\text{ }^\circ\text{C}$  per min.

## Characterization of complex 2:

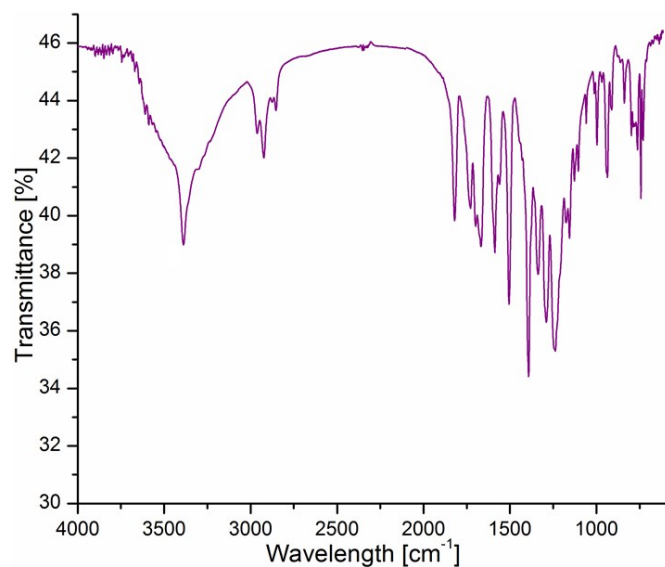

**Figure S7:** FT-IR spectrum of receptor bicarbonate-dimer complex **2** recorded in KBr pellet: 3258  $\text{cm}^{-1}$   $\nu_s(\text{N-H})$ , 3039  $\text{cm}^{-1}$   $\nu_s(\text{C-H})$ , 2876  $\text{cm}^{-1}$   $\nu_s(\text{C-H})$ , 1676  $\text{cm}^{-1}$   $\nu_s(\text{C=O})$ , 1257  $\text{cm}^{-1}$   $\nu_s(\text{C-F})$ .

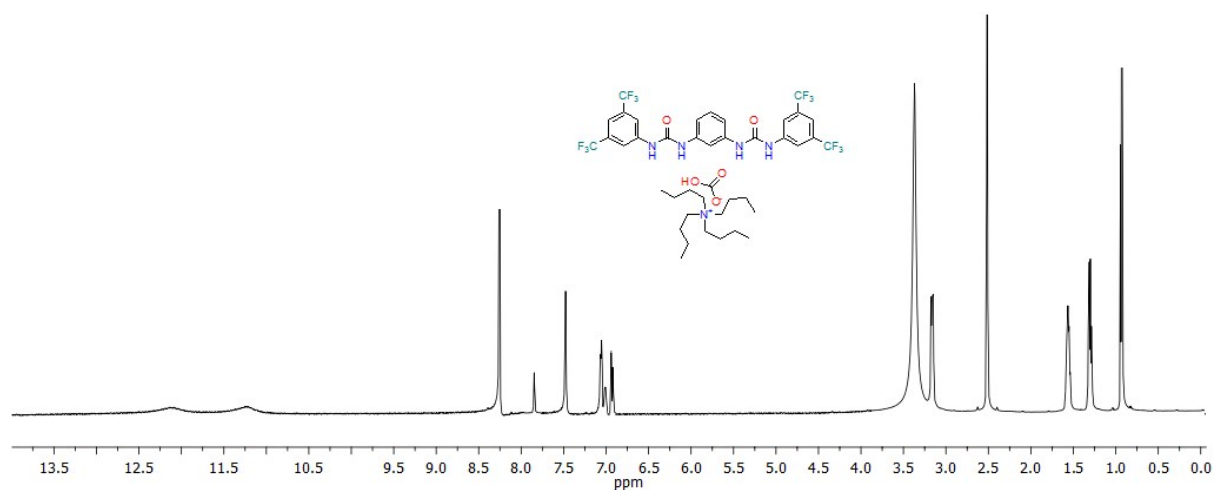

**Figure S8:**  $^1\text{H}$  NMR spectrum of complex **2** in  $\text{DMSO-}d_6$  (Varian-600 MHz) at 298 K,  $\delta$  (ppm): 0.906-0.930 (t, 12H,  $\sim 7.2$  Hz, TBA- $\text{CH}_3$ ), 1.261-1.323 (m, 8H, TBA- $\text{CH}_2$ ), 1.523-1.575 (m, 8H, TBA- $\text{CH}_2$ ), 3.134-3.162 (t, 8H,  $\sim 7.8$  Hz,  $\text{N}^+$ -TBA- $\text{CH}_2$ ), 6.923-7.107 (m, 3H, Ar-H), 7.477 (s, 2H, Ar-H), 7.865 (s, 1H, Ar-H), 8.254 (s, 4H, Ar-H), 11.221 (s, 2H,  $\text{NH}_a$ ), 12.105 (s, 2H,  $\text{NH}_b$ ).

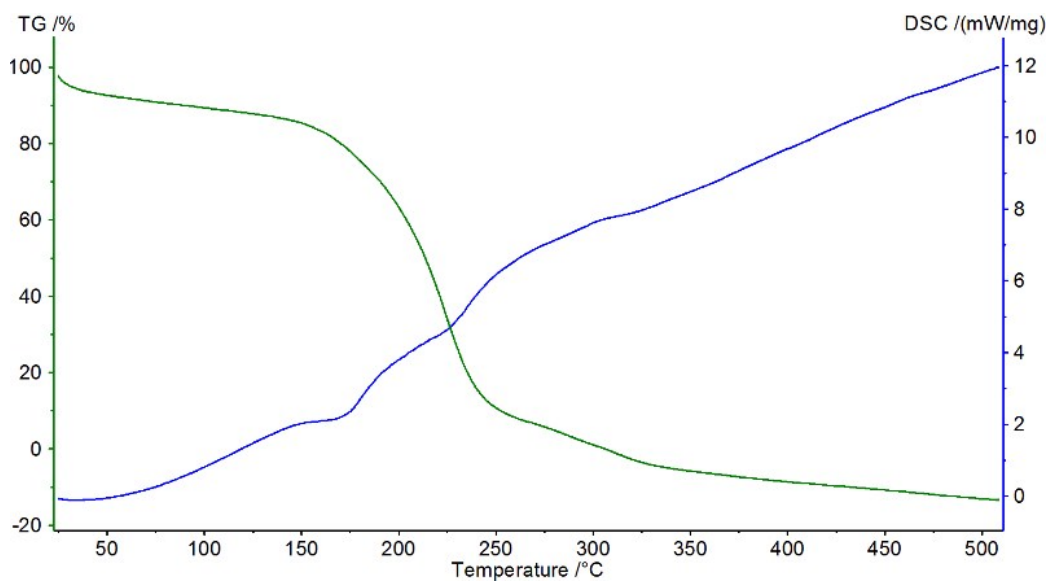

**Figure S9:** Thermogravimetric analysis (TGA) curve differential scanning calorimetry (DSC) curve of complex **2** at a heating rate of 10 °C per min.

### Characterization of complex **3**:

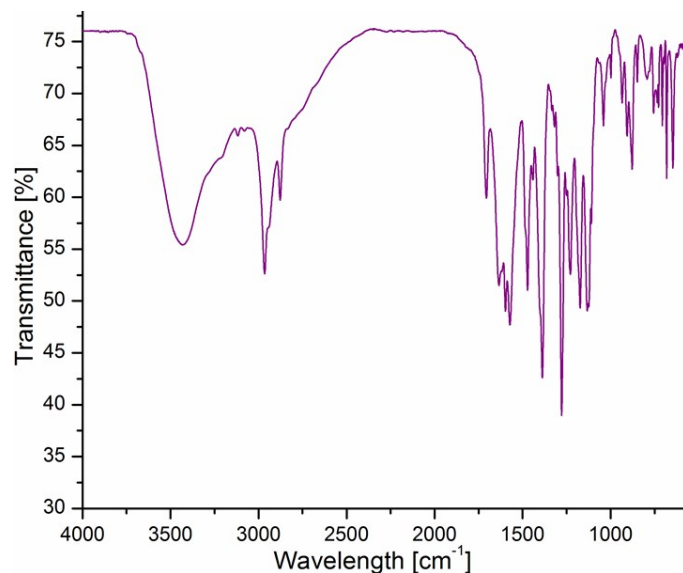

**Figure S10:** FT-IR spectrum of hydrated-acetate complex **3** recorded in KBr pellet: broad band at 3451  $\text{cm}^{-1}$   $\nu_{\text{s}}(\text{O-H})$ , 3345  $\text{cm}^{-1}$   $\nu_{\text{s}}(\text{N-H})$ , 3038  $\text{cm}^{-1}$   $\nu_{\text{s}}(\text{C-H})$ , 2836  $\text{cm}^{-1}$   $\nu_{\text{s}}(\text{C-H})$ , 1658  $\text{cm}^{-1}$   $\nu_{\text{s}}(\text{C=O})$ , 1265  $\text{cm}^{-1}$   $\nu_{\text{s}}(\text{C-F})$ .

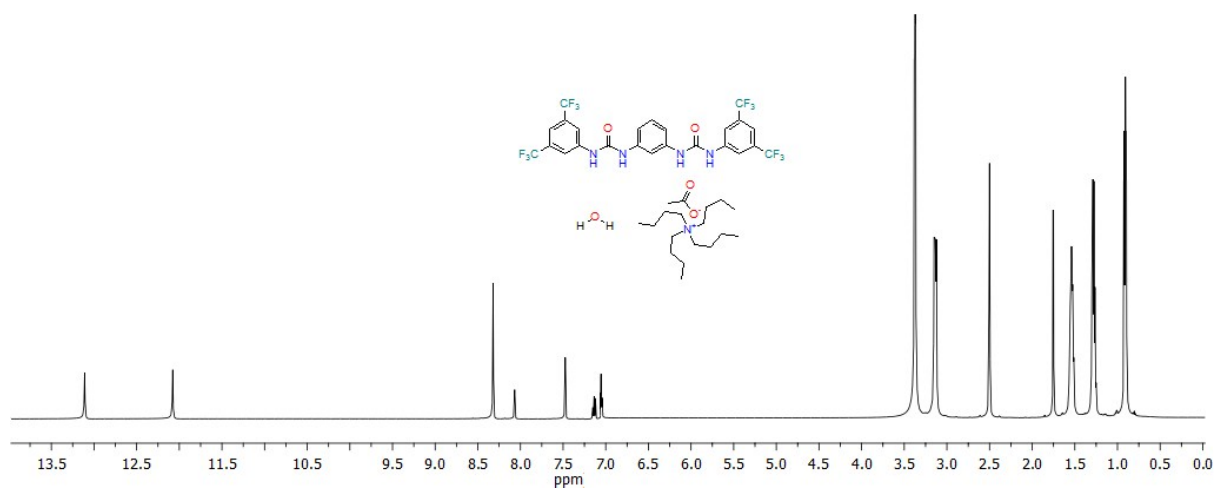

**Figure S11:**  $^1\text{H}$  NMR spectrum of complex **3** in  $\text{DMSO-}d_6$  (Varian-600 MHz) at 298 K,  $\delta$  (ppm): 0.896-0.921 (t, 12H,  $\sim 7.8$  Hz, TBA- $\text{CH}_3$ ), 1.251-1.312 (m, 8H, TBA- $\text{CH}_2$ ), 1.512-1.564 (m, 8H, TBA- $\text{CH}_2$ ), 1.752 (s, 3H,  $-\text{CH}_3\text{COO}^-$ ), 3.122-3.150 (t, 8H,  $\sim 8.4$  Hz,  $\text{N}^+\text{-TBA-CH}_2$ ), 7.028-7.098 (m, 3H, Ar-H), 7.475 (s, 2H, Ar-H), 8.068 (s, 1H, Ar-H), 8.321 (s, 4H, Ar-H), 12.077 (s, 2H,  $\text{NH}_a$ ), 13.110 (s, 2H,  $\text{NH}_b$ ).

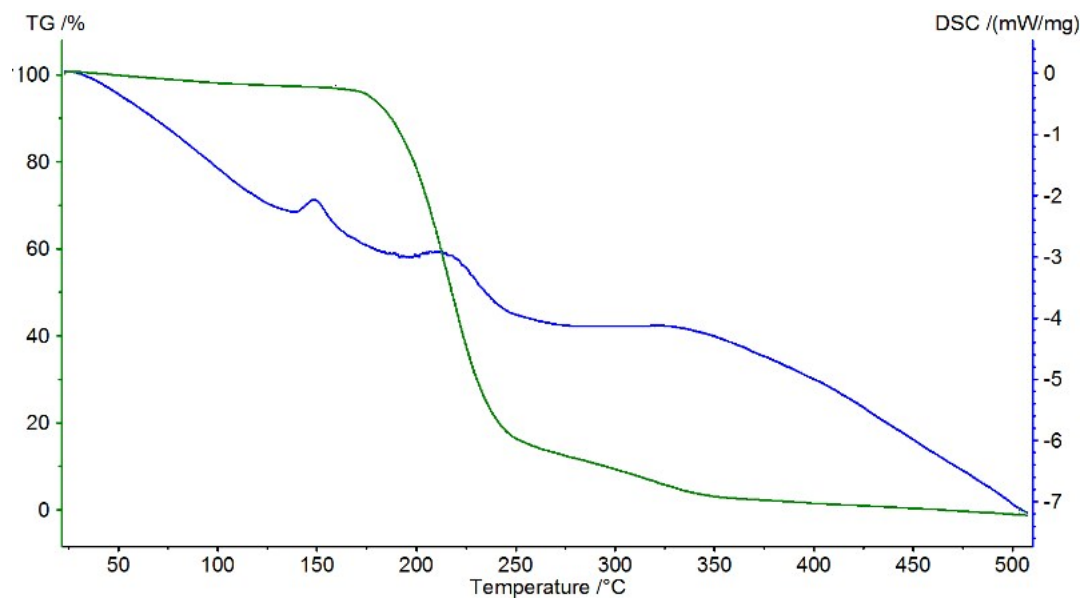

**Figure S12:** Thermogravimetric analysis (TGA) curve differential scanning calorimetry (DSC) curve of complex **3** at a heating rate of  $10\text{ }^\circ\text{C}$  per min.

## Characterization of complex 4:

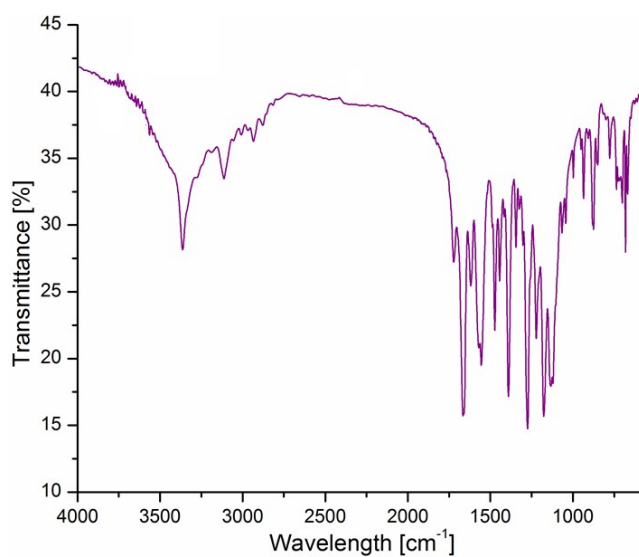

**Figure S13:** FT-IR spectrum of hydrated chloride complex **4** recorded in KBr pellet: 3373  $\text{cm}^{-1}$   $\nu_s(\text{N-H})$ , 3289  $\text{cm}^{-1}$   $\nu_s(\text{C-H})$ , 3108  $\text{cm}^{-1}$   $\nu_s(\text{C-H})$ , 1667  $\text{cm}^{-1}$   $\nu_s(\text{C=O})$ , 1261  $\text{cm}^{-1}$   $\nu_s(\text{C-F})$ .

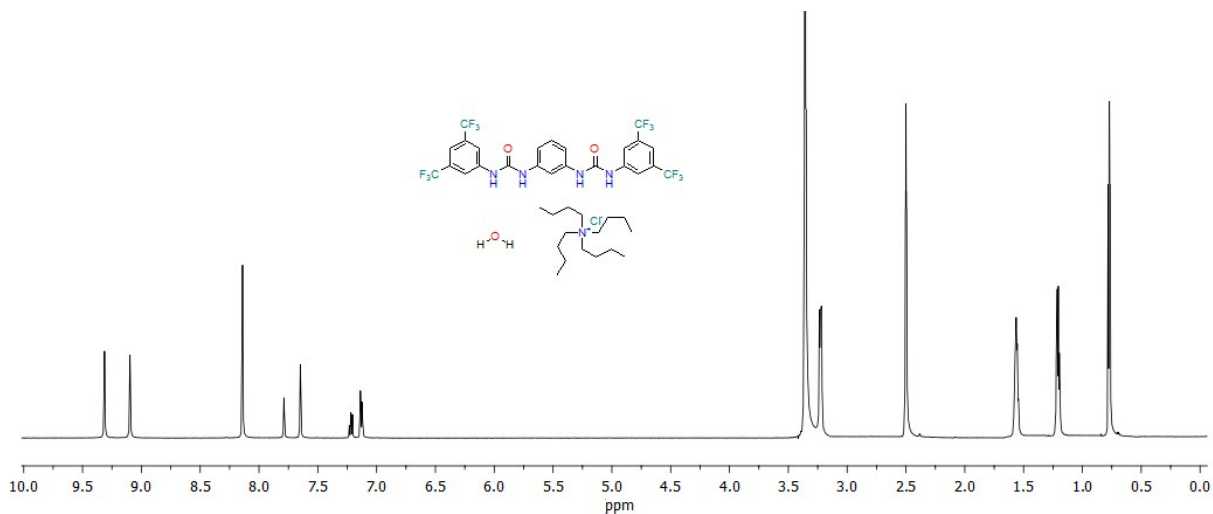

**Figure S14:**  $^1\text{H}$  NMR spectrum of complex **4** in  $\text{DMSO-}d_6$  (Varian-600 MHz) at 298 K,  $\delta$  (ppm): 0.908-0.945 (t, 12H,  $\sim 7.2$  Hz, TBA- $\text{CH}_3$ ), 1.254-1.347 (m, 8H, TBA- $\text{CH}_2$ ), 1.515-1.596 (m, 8H, TBA- $\text{CH}_2$ ), 3.137-3.179 (t, 8H,  $\sim 7.8$  Hz,  $\text{N}^+$ -TBA- $\text{CH}_2$ ), 7.121-7.135 (d, 2H,  $\sim 8.4$  Hz, Ar-H), 7.205-7.232 (t, 1H,  $\sim 7.8$  Hz, Ar-H), 7.648 (s, 2H, Ar-H), 7.788 (s, 1H, Ar-H), 8.140 (s, 4H, Ar-H), 9.097 (s, 2H,  $\text{NH}_a$ ), 9.313 (s, 2H,  $\text{NH}_b$ ).



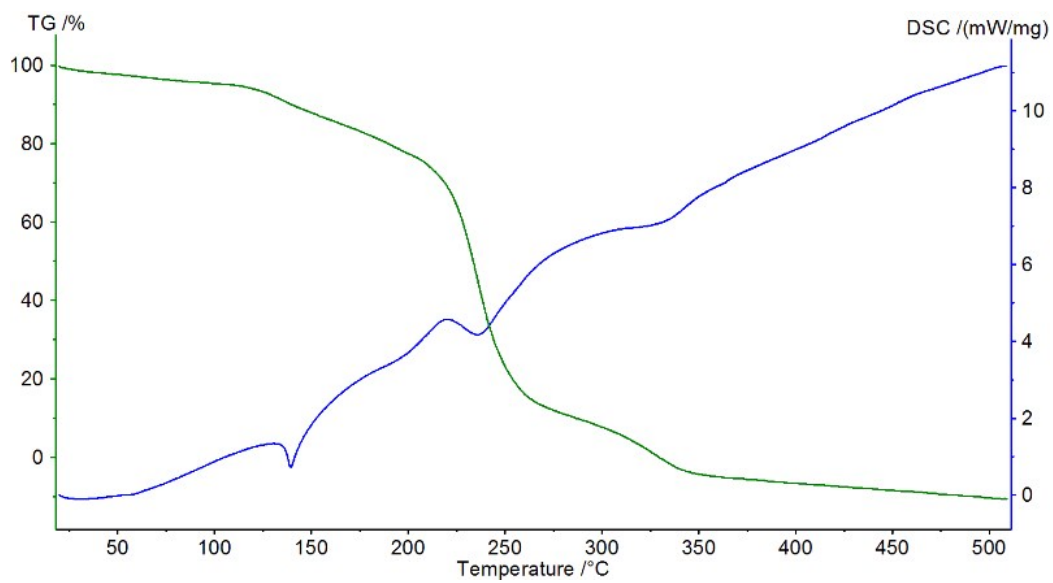

**Figure S15:** Thermogravimetric analysis (TGA) curve differential scanning calorimetry (DSC) curve of complex **4** at a heating rate of 10 °C per min.

**Solution state anion binding study:**

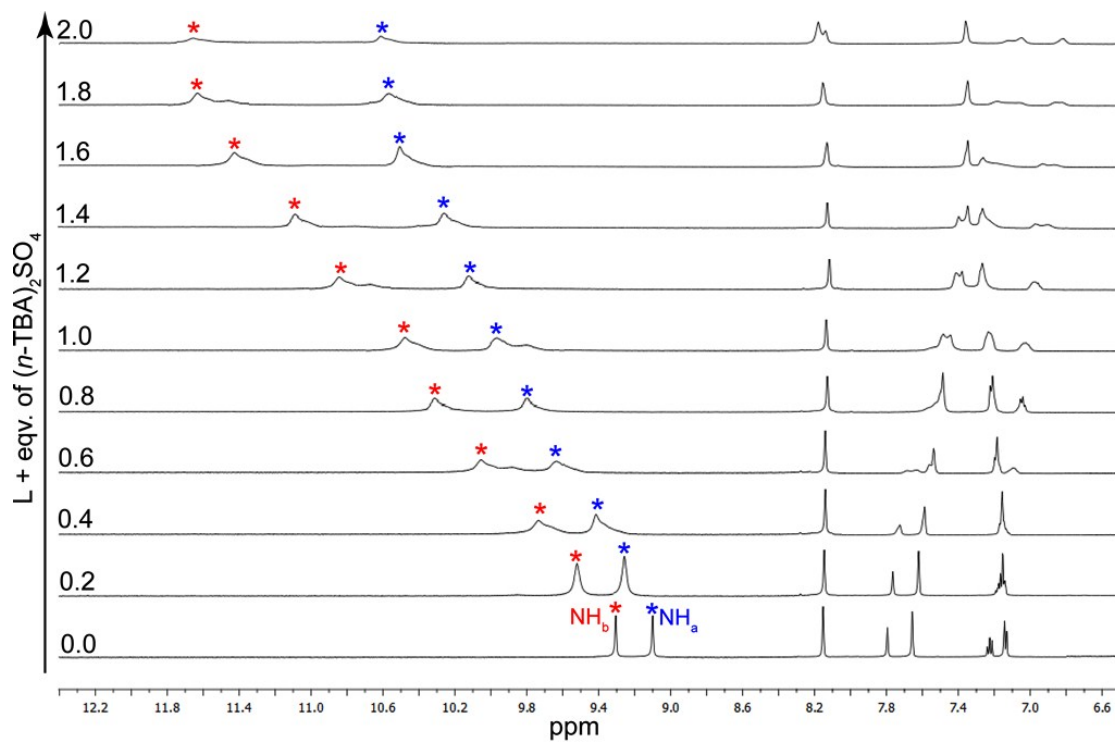

**Figure S16:** Expanded partial  $^1\text{H}$  NMR spectra of **L** upon titration with  $(n\text{-TBA})_2\text{SO}_4$  in  $\text{DMSO-d}_6$ .

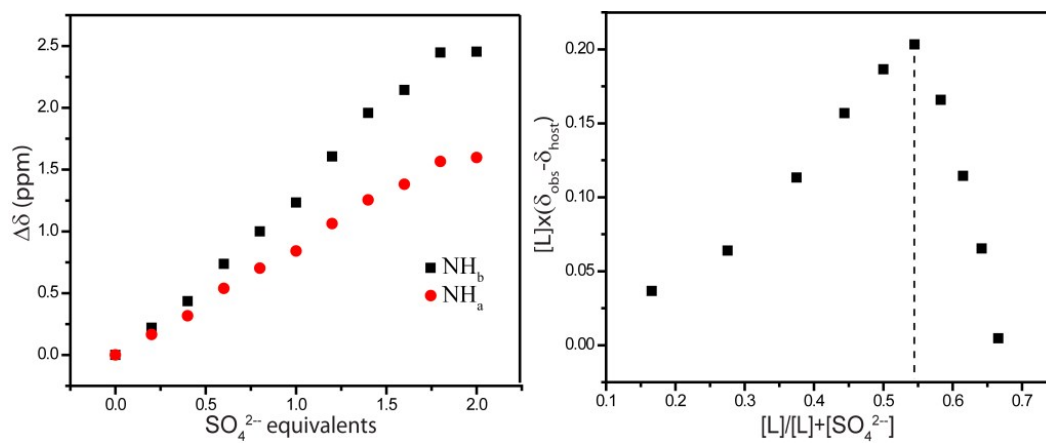

**Figure S17:** Change in chemical shift of  $-\text{NH}$  resonances of **L** (10 mM) with increasing concentration of standard  $\text{SO}_4^{2-}$  solution (50 mM) in  $\text{DMSO-d}_6$  at 298 K and the corresponding Job's plot.

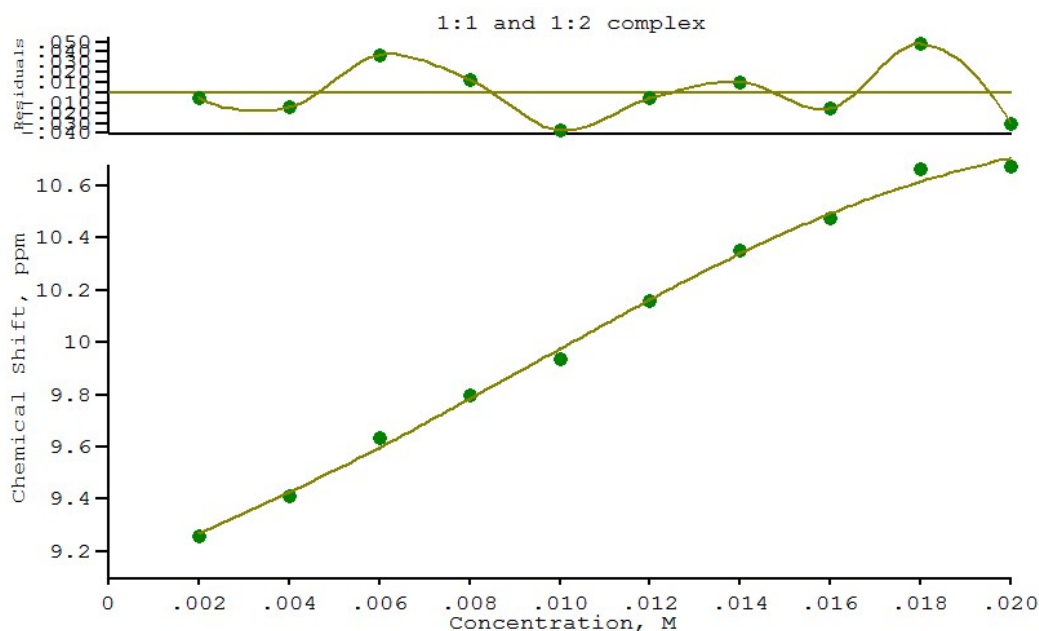

**Figure S18:** Change in chemical shift of  $-\text{NH}_a$  resonances of **L** (10 mM) with increasing concentration of standard  $\text{SO}_4^{2-}$  solution (50 mM) in  $\text{DMSO-d}_6$

Calculations by WinEQNMR2 Version 2.00 by Michael J. Hynes  
 Program run at 10:23:55 on 08/09/2017

1:1 and 1:2 complex

Equilibrium constants are log10 values

NO. A PARAMETER DELTA ERROR CONDITION DESCRIPTION

1 1 2.44173E+00 3.200E-02 2.381E+00 7.590E+02 K11  
 2 1 5.04534E+00 3.600E-02 6.543E-01 3.369E+02 K12  
 3 1 9.12413E+00 1.000E-02 6.688E-02 7.405E+00 Free Ligand  
 4 1 1.00087E+01 1.000E-02 1.148E+00 5.855E+02 complex11  
 5 1 1.10217E+01 1.000E-02 9.252E-01 1.242E+03 complex12

ORMS ERROR = 3.68E-02 MAX ERROR = 4.79E-02 AT OBS.NO. 9

RESIDUALS SQUARED = 6.76E-03

RFACTOR = 0.2587 PERCENT

| NO. | A | EXPT.      | DEL        | CALC.       | DEL         | RESIDUAL   | % DEV      | WEIGHT     | SO42-      | L | pH |
|-----|---|------------|------------|-------------|-------------|------------|------------|------------|------------|---|----|
| 1   | 1 | 9.2610E+00 | 9.2666E+00 | -5.6362E-03 | -6.0860E-02 | 1.0000E+00 | 2.0000E-03 | 9.6000E-03 | 0.0000E+00 |   |    |
| 2   | 1 | 9.4130E+00 | 9.4274E+00 | -1.4425E-02 | -1.5325E-01 | 1.0000E+00 | 4.0000E-03 | 9.2000E-03 | 0.0000E+00 |   |    |
| 3   | 1 | 9.6340E+00 | 9.5971E+00 | 3.6897E-02  | 3.8298E-01  | 1.0000E+00 | 6.0000E-03 | 8.9000E-03 | 0.0000E+00 |   |    |
| 4   | 1 | 9.7980E+00 | 9.7851E+00 | 1.2913E-02  | 1.3179E-01  | 1.0000E+00 | 8.0000E-03 | 8.4000E-03 | 0.0000E+00 |   |    |
| 5   | 1 | 9.9370E+00 | 9.9743E+00 | -3.7262E-02 | -3.7498E-01 | 1.0000E+00 | 1.0000E-02 | 8.0000E-03 | 0.0000E+00 |   |    |
| 6   | 1 | 1.0158E+01 | 1.0164E+01 | -5.5628E-03 | -5.4763E-02 | 1.0000E+00 | 1.2000E-02 | 7.6000E-03 | 0.0000E+00 |   |    |
| 7   | 1 | 1.0350E+01 | 1.0340E+01 | 1.0447E-02  | 1.0093E-01  | 1.0000E+00 | 1.4000E-02 | 7.2000E-03 | 0.0000E+00 |   |    |
| 8   | 1 | 1.0477E+01 | 1.0492E+01 | -1.5385E-02 | -1.4684E-01 | 1.0000E+00 | 1.6000E-02 | 6.8000E-03 | 0.0000E+00 |   |    |
| 9   | 1 | 1.0662E+01 | 1.0614E+01 | 4.7938E-02  | 4.4962E-01  | 1.0000E+00 | 1.8000E-02 | 6.4000E-03 | 0.0000E+00 |   |    |
| 10  | 1 | 1.0674E+01 | 1.0704E+01 | -3.0411E-02 | -2.8491E-01 | 1.0000E+00 | 2.0000E-02 | 6.0000E-03 | 0.0000E+00 |   |    |

TOLERANCE ON SUM OF SQUARES 0.0100

TOLERANCE ON EIGEN VALUES 0.0001

CONVERGANCE AFTER 19 ITERATIONS

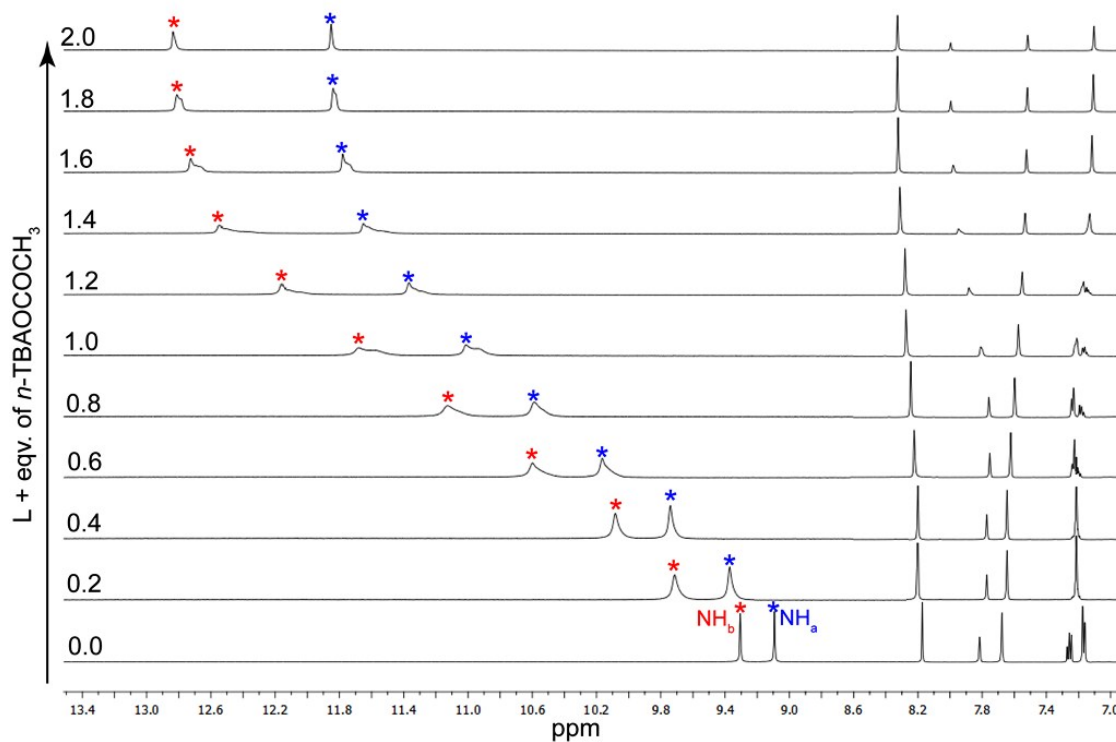

**Figure S19:** Expanded partial  $^1\text{H}$  NMR spectra of **L** upon titration with *n*-TBAOCOCH<sub>3</sub> in DMSO-*d*<sub>6</sub>.

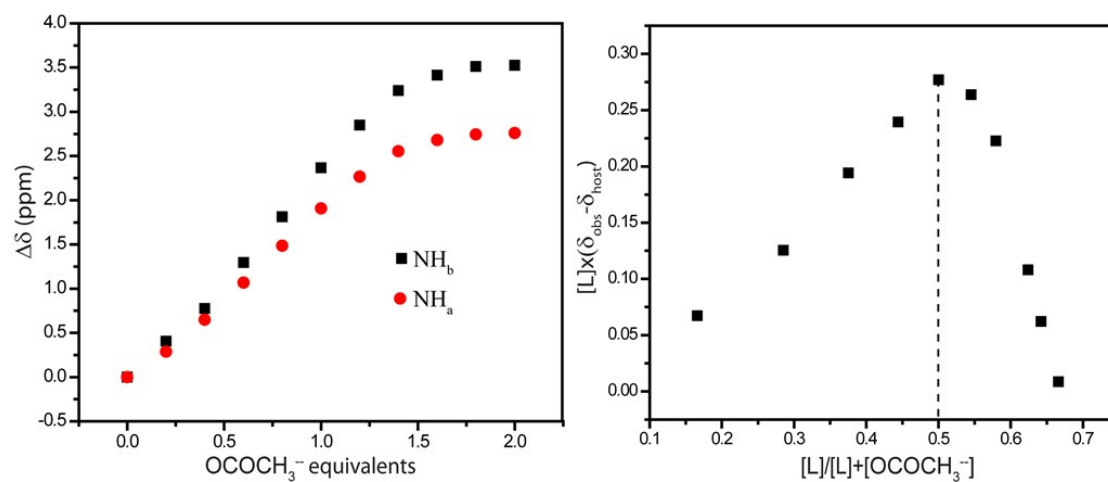

**Figure S20:** Change in chemical shift of  $-\text{NH}$  resonances of **L** (10 mM) with increasing conc. of standard OCOCH<sub>3</sub><sup>-</sup> solution (50 mM) in DMSO-*d*<sub>6</sub> at 298 K and the corresponding Job's plot.

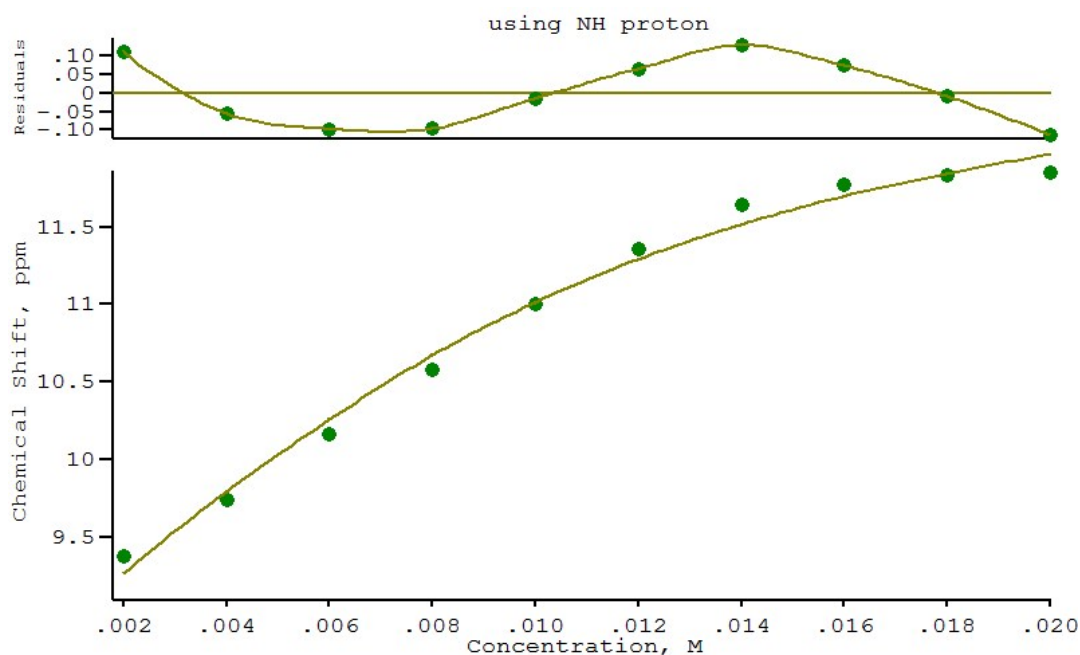

**Figure S21:** Change in chemical shift of  $\text{-NH}_a$  resonances of **L** (10 mM) with increasing concentration of standard  $\text{OCOCH}_3^-$  solution (50 mM) in  $\text{DMSO-d}_6$

Calculations by WinEQNMR2 Version 2.00 by Michael J. Hynes  
 Program run at 02:14:10 on 08/09/2017

using NH proton

Equilibrium constants are log10 values

| NO. | A | PARAMETER   | DELTA     | ERROR     | CONDITION | DESCRIPTION |
|-----|---|-------------|-----------|-----------|-----------|-------------|
| 1   | 1 | 2.30927E+00 | 1.000E-02 | 1.603E-01 | 6.194E+01 | K1          |
| 2   | 1 | 8.70554E+00 | 9.090E-02 | 1.157E-01 | 3.463E+00 | free ligand |
| 3   | 1 | 1.30001E+01 | 1.186E-01 | 4.121E-01 | 4.987E+01 | complex     |

ORMS ERROR = 1.03E-01 MAX ERROR = 1.30E-01 AT OBS.NO. 7  
 RESIDUALS SQUARED = 7.38E-02  
 RFACTOR = 0.7834 PERCENT

| NO. | A | EXPT.      | DEL        | CALC.       | DEL         | RESIDUAL   | % DEV      | WEIGHT     | OAC-       | L | pH |
|-----|---|------------|------------|-------------|-------------|------------|------------|------------|------------|---|----|
| 1   | 1 | 9.3790E+00 | 9.2686E+00 | 1.1045E-01  | 1.1776E+00  | 1.0000E+00 | 2.0000E-03 | 9.6000E-03 | 0.0000E+00 |   |    |
| 2   | 1 | 9.7400E+00 | 9.7942E+00 | -5.4196E-02 | -5.5643E-01 | 1.0000E+00 | 4.0000E-03 | 9.2000E-03 | 0.0000E+00 |   |    |
| 3   | 1 | 1.0161E+01 | 1.0258E+01 | -9.7404E-02 | -9.5860E-01 | 1.0000E+00 | 6.0000E-03 | 8.9000E-03 | 0.0000E+00 |   |    |
| 4   | 1 | 1.0577E+01 | 1.0673E+01 | -9.5893E-02 | -9.0662E-01 | 1.0000E+00 | 8.0000E-03 | 8.4000E-03 | 0.0000E+00 |   |    |
| 5   | 1 | 1.1001E+01 | 1.1015E+01 | -1.3565E-02 | -1.2331E-01 | 1.0000E+00 | 1.0000E-02 | 8.0000E-03 | 0.0000E+00 |   |    |
| 6   | 1 | 1.1359E+01 | 1.1292E+01 | 6.6730E-02  | 5.8746E-01  | 1.0000E+00 | 1.2000E-02 | 7.6000E-03 | 0.0000E+00 |   |    |
| 7   | 1 | 1.1647E+01 | 1.1517E+01 | 1.3018E-01  | 1.1177E+00  | 1.0000E+00 | 1.4000E-02 | 7.2000E-03 | 0.0000E+00 |   |    |
| 8   | 1 | 1.1773E+01 | 1.1698E+01 | 7.4896E-02  | 6.3617E-01  | 1.0000E+00 | 1.6000E-02 | 6.8000E-03 | 0.0000E+00 |   |    |
| 9   | 1 | 1.1837E+01 | 1.1845E+01 | -8.3256E-03 | -7.0335E-02 | 1.0000E+00 | 1.8000E-02 | 6.4000E-03 | 0.0000E+00 |   |    |
| 10  | 1 | 1.1853E+01 | 1.1966E+01 | -1.1287E-01 | -9.5227E-01 | 1.0000E+00 | 2.0000E-02 | 6.0000E-03 | 0.0000E+00 |   |    |

TOLERANCE ON SUM OF SQUARES 0.0100  
 TOLERANCE ON EIGEN VALUES 0.0001  
 CONVERGANCE AFTER 17 ITERATIONS

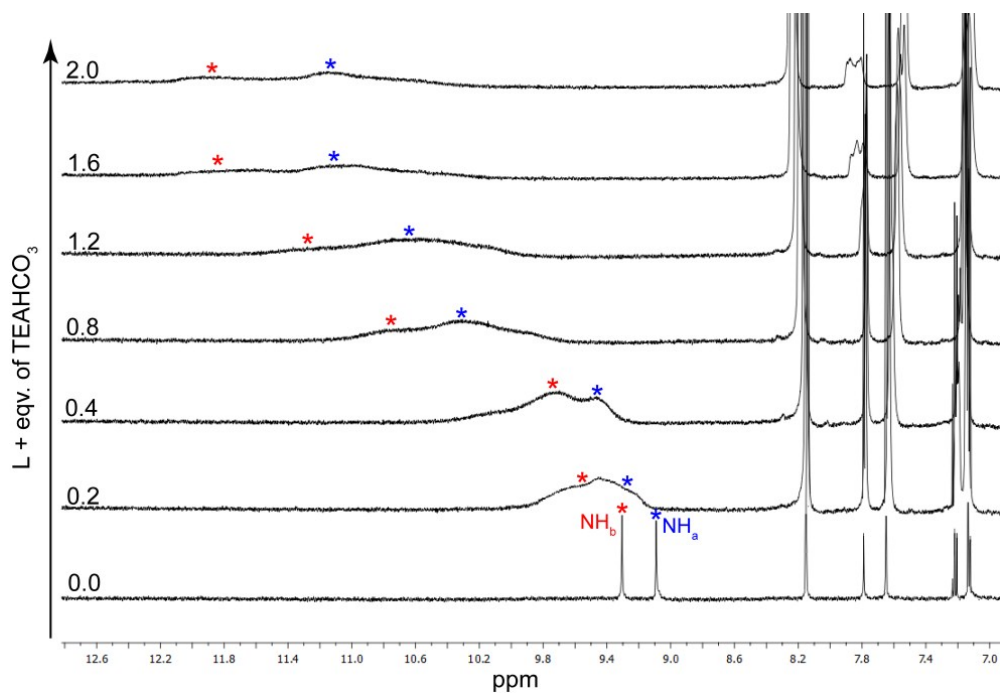

**Figure S22:** Expanded partial  $^1\text{H}$  NMR spectra of **L** upon titration with  $\text{TEAHCO}_3$  in  $\text{DMSO-d}_6$  showing severe broadening of urea  $-\text{NH}$  peaks on gradual anion addition.

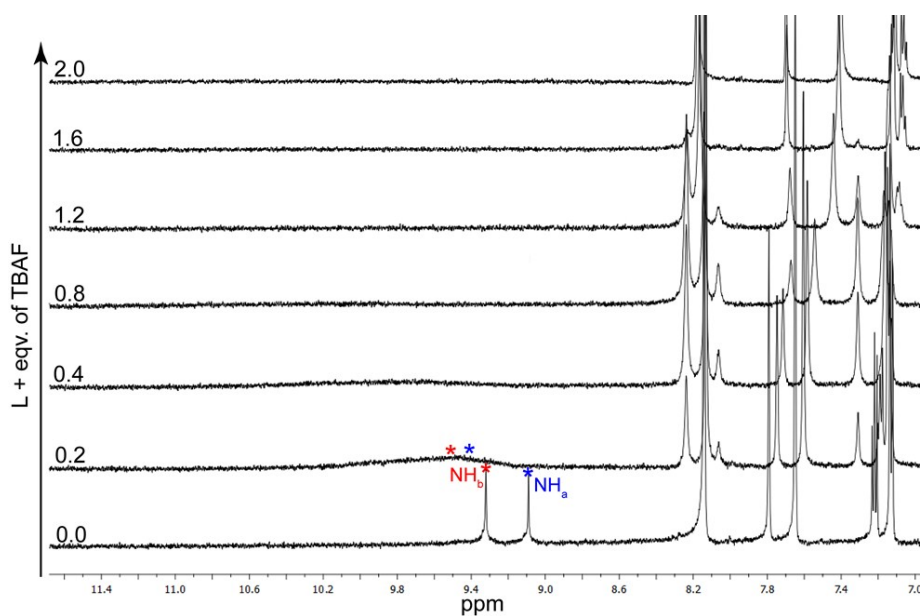

**Figure S23:** Expanded partial  $^1\text{H}$  NMR spectra of **L** upon titration with *n*-TBAF in  $\text{DMSO-d}_6$  displaying disappearance of urea  $-\text{NH}$  peaks followed by severe broadening may be due to deprotonation.

**Table S1.** Hydrogen bonding distances (Å) and Bond angles (°) in free ligand and its complexes **1**, **2**, **3** and **4**):

| Complex       | D-H...A         | $d(D\cdots H)/\text{Å}$ | $d(H\cdots A)/\text{Å}$ | $d(D\cdots A)/\text{Å}$ | $\angle D-H\cdots A/^\circ$ | Symmetry codes   |
|---------------|-----------------|-------------------------|-------------------------|-------------------------|-----------------------------|------------------|
| <b>L.DMF</b>  | N1-H1N...O5     | 0.86                    | 2.14                    | 2.940(5)                | 156                         | 1-x,-1/2+y,1/2-z |
|               | N2-H2N...O5     | 0.86                    | 2.03                    | 2.843(5)                | 157                         | 1-x,-1/2+y,1/2-z |
|               | N5-H5N...O6     | 0.86                    | 2.05                    | 2.863(6)                | 158                         | 1-x,1-y,1-z      |
|               | N6-H6N...O6     | 0.86                    | 2.13                    | 2.932(6)                | 156                         | 1-x,1-y,1-z      |
|               | N7-H7N...O7     | 0.86                    | 2.00                    | 2.821(6)                | 161                         | x,y,z            |
|               | N8-H8N...O8     | 0.86                    | 2.12                    | 2.880(6)                | 146                         | x,y,z            |
| <b>L.DMSO</b> | N1-H1N...O4     | 0.86                    | 2.07                    | 2.883(6)                | 158                         | 1-x,-y,1-z       |
|               | N2-H2N...O4     | 0.86                    | 2.10                    | 2.908(5)                | 157                         | 1-x,-y,1-z       |
| <b>1</b>      | N1-H1N...O10    | 0.86                    | 1.97                    | 2.817(7)                | 168                         | -1+x,y,z         |
|               | N2-H2N...O9     | 0.86                    | 1.99                    | 2.805(6)                | 157                         | -1+x,y,z         |
|               | N3-H3N...O8     | 0.86                    | 2.01                    | 2.843(6)                | 162                         | 1-x,1/2+y,1/2-z  |
|               | N4-H4N...O7     | 0.86                    | 1.93                    | 2.750(6)                | 159                         | 1-x,1/2+y,1/2-z  |
|               | N5-H5N...O12    | 0.86                    | 2.26                    | 3.082(8)                | 160                         | x,y,z            |
|               | N5-H5N...O13    |                         | 2.57                    | 3.277(6)                | 140                         | x,y,z            |
|               | N6-H6N...O13    | 0.86                    | 2.00                    | 2.831(6)                | 163                         | x,y,z            |
|               | N7-H7N...O8     | 0.86                    | 2.05                    | 2.842(6)                | 153                         | -1+x,y,z         |
|               | N8-H8N...O9     | 0.86                    | 1.87                    | 2.729(6)                | 175                         | -1+x,y,z         |
|               | N9-H9N...O14    | 0.86                    | 1.93                    | 2.769(7)                | 167                         | 1-x,-1/2+y,1/2-z |
|               | N10-H10N...O12  | 0.86                    | 2.27                    | 3.113(8)                | 166                         | 1-x,-1/2+y,1/2-z |
|               | N11-H11N...O11  | 0.86                    | 1.99                    | 2.845(6)                | 171                         | x,y,z            |
|               | N12-H12N...O13  | 0.86                    | 2.01                    | 2.841(6)                | 162                         | x,y,z            |
|               | C114-H24C...O4  | 0.97                    | 2.39                    | 3.343(12)               | 166                         | x,y,z            |
|               | C121-H31C...O6  | 0.97                    | 2.35                    | 3.311(8)                | 171                         | 1-x,1/2+y,1/2-z  |
|               | C125-H35D...O10 | 0.97                    | 2.40                    | 3.300(7)                | 154                         | x,y,z            |
|               | C73-H73B...F9   | 0.97                    | 2.51                    | 3.327(13)               | 142                         | 1-x,1-y,1-z      |
|               | C87-H87A...O16  | 0.97                    | 2.13                    | 3.01(6)                 | 151                         | x,y,z            |
|               | C93-H93B...O3   | 0.97                    | 2.44                    | 3.381(12)               | 163                         | x,y,z            |
|               | C97-H97A...F5   | 0.97                    | 2.53                    | 3.460(13)               | 160                         | -x,1-y,1-z       |
| C98-H98B...O2 | 0.97            | 2.39                    | 3.298(10)               | 156                     | x,y,z                       |                  |
| <b>2</b>      | N1-H1N...O3     | 0.86                    | 1.89                    | 2.724(5)                | 165                         | x,y,z            |
|               | N2-H2N...O4     | 0.86                    | 1.95                    | 2.802(5)                | 172                         | x,y,z            |
|               | N3-H3N...O7     | 0.86                    | 1.92                    | 2.777(5)                | 173                         | x,y,z            |
|               | N4-H4N...O6     | 0.86                    | 1.92                    | 2.767(5)                | 167                         | x,y,z            |
|               | O5-H5O...O7     | 0.99                    | 1.63                    | 2.614(7)                | 174                         | -x,1/2+y,1/2-z   |
|               | O8-H8O...O4     | 1.00                    | 1.70                    | 2.611(5)                | 149                         | -x,-1/2+y,1/2-z  |
|               | C26-H26B...O5   | 0.97                    | 2.59                    | 3.408(9)                | 143                         | x,3/2-y,-1/2+z   |
|               | C33-H33B...O2   | 0.97                    | 2.40                    | 3.336(8)                | 162                         | x,y,z            |
|               | C37-H37B...O3   | 0.97                    | 2.54                    | 3.425(7)                | 153                         | x,3/2-y,-1/2+z   |
|               | C38-H38B...O2   | 0.97                    | 2.45                    | 3.372(7)                | 159                         | x,y,z            |
|               | C49-H49A...O6   | 0.97                    | 2.59                    | 3.436(7)                | 145                         | x,1/2-y,1/2+z    |
|               | C50-H50A...O1   | 0.97                    | 2.58                    | 3.490(7)                | 156                         | x,y,z            |
|               | C53-H53A...O1   | 0.97                    | 2.43                    | 3.368(7)                | 163                         | x,y,z            |
|               | <b>3</b>        | N1-H1N...O3             | 0.86                    | 2.01                    | 2.859(8)                    | 169              |
| N2-H2N...O4   |                 | 0.86                    | 1.94                    | 2.784(8)                | 168                         | 1-x,-1/2+y,-z    |
| N3-H3N...O5   |                 | 0.86                    | 2.17                    | 2.981(7)                | 157                         | -1+x,y,z         |
| N4-H4N...O5   |                 | 0.86                    | 2.00                    | 2.832(8)                | 162                         | -1+x,y,z         |
| C29-H29A...O2 |                 | 0.97                    | 2.58                    | 3.495(15)               | 158                         | x,y,z            |
| C36-H36A...F1 |                 | 0.96                    | 2.50                    | 3.31(2)                 | 142                         | -1+x,1+y,z       |
| <b>4</b>      | N1-H1N...O3A    | 0.86                    | 2.24                    | 3.059(9)                | 158                         | -x,y,1/2-z       |
|               | N1-H1N...O3B    | 0.86                    | 2.37                    | 3.173(14)               | 155                         | -x,y,1/2-z       |
|               | N2-H2N...O3A    | 0.86                    | 2.45                    | 3.231(9)                | 152                         | -x,y,1/2-z       |
|               | N2-H2N...O3B    | 0.86                    | 2.18                    | 3.023(14)               | 165                         | -x,y,1/2-z       |
|               | N3-H3N...C11    | 0.86                    | 2.40                    | 3.210(3)                | 158                         | x,y,z            |
|               | N4-H4N...C11    | 0.86                    | 2.31                    | 3.119(3)                | 157                         | x,y,z            |

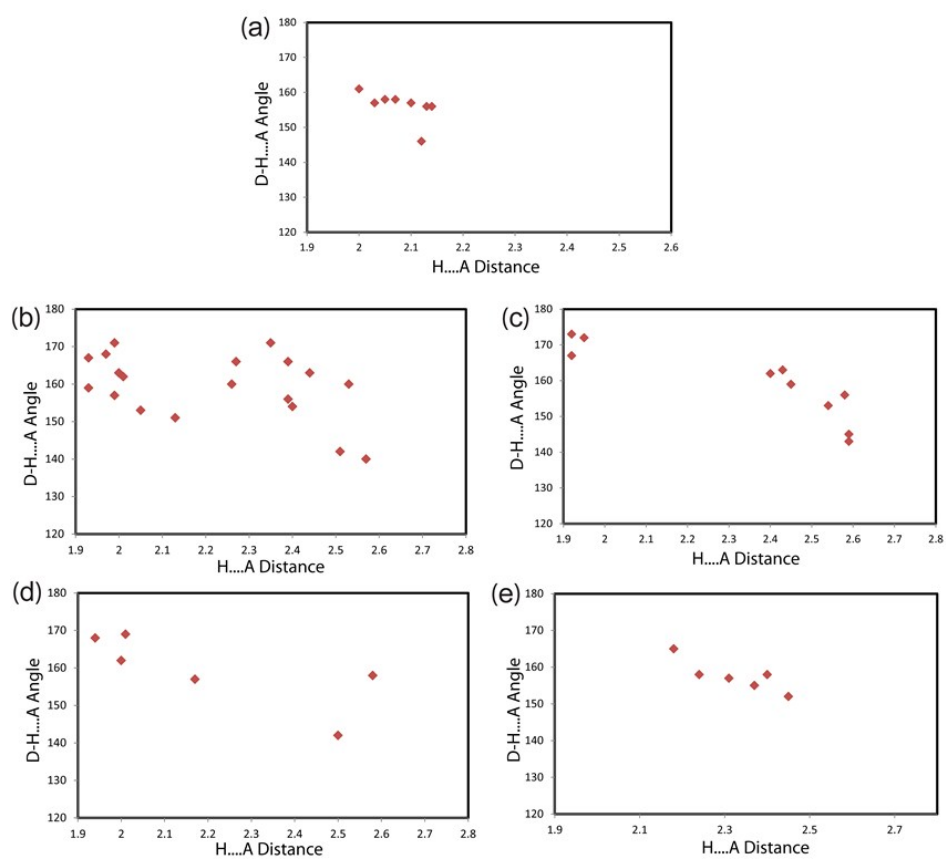

**Figure S24.** The scatter plot of N-H...A angle vs. H...A distance of the hydrogen bonds in (a) free receptor **L** and in the complexes (b) complex **1**, (c) complex **2**, (d) complex **3** and (e) complex **4**.



**Table S2.** Comparison of some recently reported anion-water clusters and CO<sub>2</sub> fixation with the present work.

| Sl. No | Reference                                                                                                                           | Host-guest complex | Receptor/Ligand                                                                     | Hydrated-halide recognition                                                                                                                                                               | Hydrated-oxyanion recognition                                                                                                                                                                                                                                                                                                     | Aerial CO <sub>2</sub> fixation                                  | Conclusion/observation from result                                                                                                                                                              |
|--------|-------------------------------------------------------------------------------------------------------------------------------------|--------------------|-------------------------------------------------------------------------------------|-------------------------------------------------------------------------------------------------------------------------------------------------------------------------------------------|-----------------------------------------------------------------------------------------------------------------------------------------------------------------------------------------------------------------------------------------------------------------------------------------------------------------------------------|------------------------------------------------------------------|-------------------------------------------------------------------------------------------------------------------------------------------------------------------------------------------------|
| 1      | Present work                                                                                                                        | Neutral            | 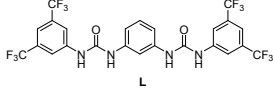   | Acyclic<br>(Cl <sup>-</sup> ) <sub>2</sub> (H <sub>2</sub> O) <sub>2</sub>                                                                                                                | a) asymmetric (SO <sub>4</sub> ) <sub>2</sub> (H <sub>2</sub> O) <sub>2</sub><br><br>b) Polymeric<br>[(OCOCH <sub>3</sub> )(H <sub>2</sub> O)] <sub>n</sub>                                                                                                                                                                       | F <sup>-</sup> induced<br>(HCO <sub>3</sub> ) <sub>2</sub> dimer | Consistent and regular anion binding mode of semi-circular receptor architecture in all anion complexes are heavily influenced by the terminal aromatic <i>meta</i> -disubstitution of receptor |
| 2      | Y-H. Luo, J-W. Wang , Y-J. Li , C. Chen , P.-J. An, S-L. Wang , C-Q. You and B-W. Sun, <i>CrystEngComm</i> , 2017, <b>19</b> , 3362 | Protonated         |    | —                                                                                                                                                                                         | a) [HSO <sub>4</sub> <sup>-</sup> ·H <sub>2</sub> O] <sub>n</sub> or [SO <sub>4</sub> <sup>2-</sup> ·H <sub>2</sub> O] <sub>n</sub> with HL <sub>1</sub> <sup>+</sup> , HL <sub>2</sub> <sup>+</sup> and HL <sub>4</sub> <sup>+</sup><br><br>b) [HL <sub>3</sub> ] <sup>+</sup> [NO <sub>3</sub> ] <sup>-</sup> ·H <sub>2</sub> O | —                                                                | Approach for aqueous/sea- water sulphate separation                                                                                                                                             |
| 3      | U. Manna, B. Nayak, M. N. Hoque and G. Das, <i>CrystEngComm</i> , 2016, <b>18</b> , 5036                                            | Protonated         |    | —                                                                                                                                                                                         | a) [(L <sub>1</sub> H <sub>3</sub> ) <sub>2</sub> (SO <sub>4</sub> ) <sub>3</sub> (H <sub>2</sub> O) <sub>8</sub> ]·3DMF<br><br>b) [(L <sub>2</sub> H <sub>3</sub> ) <sub>2</sub> (SO <sub>4</sub> ) <sub>3</sub> (H <sub>2</sub> O) <sub>8</sub> ]·4DMF                                                                          | —                                                                | Consequence of halide and oxyanion size on capsular/non-capsular assembly formation of positional isomeric tripodal polyamine receptors                                                         |
| 4      | R. Dutta, B. Akhuli and P. Ghosh <i>Dalton Trans.</i> , 2015, <b>44</b> , 15075                                                     | Neutral            |    | —                                                                                                                                                                                         | [(SO <sub>4</sub> ) <sub>4</sub> (H <sub>2</sub> O) <sub>12</sub> ] <sup>8-</sup>                                                                                                                                                                                                                                                 | —                                                                | Recognition of hydrated sulfate cluster [(SO <sub>4</sub> ) <sub>4</sub> (H <sub>2</sub> O) <sub>12</sub> ] <sup>8-</sup> in a self-assembled metal-organic coordination polymer                |
| 5      | S.Chakraborty, M. Arunachalam, R. Dutta and P. Ghosh, <i>RSC Adv.</i> , 2015, <b>5</b> , 48060                                      | Neutral            |   | [(L <sub>4</sub> ).(Cl) <sub>2</sub> .(H <sub>2</sub> O) <sub>2</sub> .(TBA) <sub>2</sub> ]                                                                                               | —                                                                                                                                                                                                                                                                                                                                 | —                                                                | Binding of anions/hydrated anions of different dimensionalities to the hexa-amide receptors with different structural arrangements                                                              |
| 6      | M. N. Hoque and G. Das, <i>CrystEngComm</i> , 2014, <b>16</b> , 4447                                                                | Protonated         |  | a) [LH <sub>4</sub> ·4F·5H <sub>2</sub> O]<br>b) [2LH <sub>4</sub> ·8Cl·5H <sub>2</sub> O]<br>c) [LH <sub>4</sub> ·4Br·5H <sub>2</sub> O]<br>d) [4LH <sub>4</sub> ·16I·7H <sub>2</sub> O] | —                                                                                                                                                                                                                                                                                                                                 | —                                                                | Capsular and non-capsular assembly of cationic tripodal receptor with hydrophilic halide-water cluster                                                                                          |

|    |                                                                                                                        |            |  |                                                                                              |                                                                                                                                                                                                                                                                                                                                                               |                                                                                                                                     |                                                                                                                                                                 |
|----|------------------------------------------------------------------------------------------------------------------------|------------|--|----------------------------------------------------------------------------------------------|---------------------------------------------------------------------------------------------------------------------------------------------------------------------------------------------------------------------------------------------------------------------------------------------------------------------------------------------------------------|-------------------------------------------------------------------------------------------------------------------------------------|-----------------------------------------------------------------------------------------------------------------------------------------------------------------|
| 7  | A. Pati, J. Athilakshmi, V. Ramkumar and D. K. Chand, <i>CrystEngComm</i> , 2014, <b>16</b> , 6827                     | Neutral    |  | $\{[(\text{H}_2\text{O})_{12}(\text{Cl})]^{1-}\}_n$ cluster of $\text{L}_1$ and $\text{L}_2$ | —                                                                                                                                                                                                                                                                                                                                                             | —                                                                                                                                   | Hydrophobic cavity induced reductive encapsulation using Hg(II) and an octaaza cryptand offering a new type of polydodecameric water-chloride cluster           |
| 8  | M. N. Hoque and G. Das, <i>Cryst. Growth Des.</i> , 2014, <b>14</b> , 2962                                             | Protonated |  | —                                                                                            | a) $[\text{LH}_4 \cdot 4\text{H}_2\text{PO}_4 \cdot \text{H}_2\text{O}]$<br>b) $[2\text{LH}_4 \cdot 9\text{ClO}_4 \cdot \text{Na} \cdot 6\text{H}_2\text{O}]$<br>c) $[\text{LH}_4 \cdot 2\text{HSO}_4 \cdot \text{SO}_4]$<br>d) $[\text{LH}_4 \cdot 2\text{SO}_4 \cdot \text{H}_2\text{O}]$<br>e) $[\text{LH}_4 \cdot 4\text{NO}_3 \cdot \text{H}_2\text{O}]$ | —                                                                                                                                   | Solid-state characterization of anion and anion-water clusters based on oxyanions                                                                               |
| 9  | R. Custelcean, N. J. Williams, C. A. Seipp, A. S. Ivanov and S. Vyacheslav <i>Chem. Eur. J.</i> 2016, <b>22</b> , 1997 | Protonated |  | —                                                                                            | $[(\text{SO}_4)_2(\text{H}_2\text{O})_4]^{4-}$                                                                                                                                                                                                                                                                                                                | —                                                                                                                                   | Approach to aqueous sulfate separation by selective crystallization with an imine-linked bis-guanidinium ligand                                                 |
| 10 | M. N. Hoque, U. Manna, G. Das, <i>Polyhedron</i> , 2016, <b>119</b> , 307                                              | Protonated |  | $[^2\text{LH}_2 \cdot 2\text{I} \cdot 3\text{H}_2\text{O}]$                                  | a) $[^3\text{LH}_2 \cdot \text{HPO}_4 \cdot \text{H}_2\text{O}]$<br>b) $[^3\text{LH}_2 \cdot 2\text{ClO}_4 \cdot \text{H}_2\text{O}]$<br>c) $[^4\text{LH}_2 \cdot 2\text{NO}_3 \cdot 3\text{H}_2\text{O}]$<br>d) $[^4\text{LH}_2 \cdot \text{HPO}_4 \cdot 3\text{H}_2\text{O}]$<br>e) $[^4\text{LH}_2 \cdot 2\text{ClO}_4 \cdot \text{H}_2\text{O}]$          | —                                                                                                                                   | Solid state recognition of anions in their various hydrated states by H-bond rich isomeric pyridine-urea receptor                                               |
| 11 | U. Manna, R. Chutia, and G. Das, <i>Cryst. Growth Des.</i> 2016, <b>16</b> , 2893                                      | Neutral    |  | $[n\text{-TBA}\{\text{L}_1(\text{F})(\text{H}_2\text{O})\}]$                                 | $4(n\text{-TBA})[3\text{L}_2\{(\text{SO}_4)(\text{H}_2\text{O})_3\text{-}(\text{SO}_4)\}]$                                                                                                                                                                                                                                                                    | —                                                                                                                                   | Positional isomeric bis-urea receptors unveil as efficient hosts toward anion water cluster/adducts                                                             |
| 12 | I. Ravikumar and P. Ghosh, <i>Chem. Commun.</i> , 2010, <b>46</b> , 1082                                               | Neutral    |  | —                                                                                            | —                                                                                                                                                                                                                                                                                                                                                             | OH <sup>-</sup> induced CO <sub>3</sub> <sup>2-</sup> encapsulation                                                                 | Fixation of environmental carbon dioxide in the form of carbonate in a molecular capsule of an easily synthesized urea based receptor                           |
| 13 | R. Chutia and G. Das, <i>Dalton Trans.</i> , 2014, <b>43</b> , 15628                                                   | Neutral    |  | —                                                                                            | —                                                                                                                                                                                                                                                                                                                                                             | F <sup>-</sup> induced (HCO <sub>3</sub> ) <sub>2</sub> dimer                                                                       | Combined act of hydrogen and halogen bonding that prompted the CO <sub>2</sub> uptake from a fluoride                                                           |
| 14 | R. Dutta, S. Chakraborty, P. Bose and P. Ghosh, <i>EJC.</i> , 2014, <b>2014</b> , 4134                                 | Neutral    |  | —                                                                                            | —                                                                                                                                                                                                                                                                                                                                                             | OH <sup>-</sup> induced CO <sub>3</sub> <sup>2-</sup> encapsulation                                                                 | Efficient encapsulation of CO <sub>3</sub> <sup>2-</sup> ions through the fixation of aerial CO <sub>2</sub> , extractant for Chromate, sulfate and thiosulfate |
| 15 | U. Manna, S. Kayal, S. Samanta and G. Das, <i>Dalton Trans.</i> , 2017, <b>46</b> , 10374.                             | Neutral    |  | —                                                                                            | $[(n\text{-TBA})_4\{(\text{L})_4(\text{CO}_3)_2(\text{H}_2\text{O})_2\}]$                                                                                                                                                                                                                                                                                     | OH <sup>-</sup> induced {CO <sub>3</sub> <sup>2-</sup> -(H <sub>2</sub> O) <sub>2</sub> -CO <sub>3</sub> <sup>2-</sup> } entrapment | Anion recognition is more affected by the size and dimension of the anions rather than the terminal aromatic substituent effect                                 |
